# Supplementary material for: Saccadic Eye Movement Abnormalities in Children with Epilepsy
Source: PubMed Central journal article supplement (PMC4970731; doi:10.1371/journal.pone.0160508), 2016-08-02
Supplement: pone.0160508.s004.pdf [file pone.0160508.s004.pdf]

S1 Table. Additional details on clinical characteristics of the patients (N = 26)

|                                                | Therapy<br>(n = 15) | No Therapy<br>(n = 11) |
|------------------------------------------------|---------------------|------------------------|
| <i>Epilepsy Syndromes</i>                      |                     |                        |
| Childhood absence epilepsy                     |                     | 1                      |
| Benign epilepsy with centrotemporal spikes     | 2                   | 3                      |
| <i>Non-syndromic epilepsies</i>                |                     |                        |
| Generalized                                    | 4                   | 4                      |
| Focal                                          | 4                   | 2                      |
| Generalized and Focal                          | 4                   | 1                      |
| Indeterminate                                  | 1                   |                        |
| Seizures in the last 6 months prior to testing | 6                   | 1*                     |

\* Parental report of a possible seizure in one patient who had never received AEDs.
