# Supplementary material for: Saccadic Eye Movement Abnormalities in Children with Epilepsy
Source: PubMed Central journal article supplement (PMC4970731; doi:10.1371/journal.pone.0160508), 2016-08-02
Supplement: pone.0160508.s005.pdf [file pone.0160508.s005.pdf]

S2 Table

Statistical results of mixed linear models on saccade task performance

|        |                      | Latency                       | Peak Velocity                | Gain                          |
|--------|----------------------|-------------------------------|------------------------------|-------------------------------|
| Fixed  | Saccade Type         | $F(2,3627) 543.93, p < 0.001$ | $F(2,3613) 46.89, p < 0.001$ | $F(2,3642) 219.36, p < 0.001$ |
|        | Group                | $F(2,73) 0.20, p = 0.75$      | $F(2,73) 1.02, p = 0.36$     | $F(2,77) 1.17, p = 0.32$      |
|        | Group * Saccade Type | $F(4,3626) 3.07, p = 0.015$   | $F(4,3612) 7.22, p < 0.001$  | $F(4,3640) 11.69, p < 0.001$  |
| Random | Participant variance | 0.78 (0.14), $p < 0.001$      | 2725.5 (473.3), $p < 0.001$  | 0.018 (.003), $p < 0.001$     |
|        | Residual             | 2.37 (0.06)                   | 4703.9 (111.1)               | 0.099 (.002)                  |
