# Supplementary material for: Saccadic Eye Movement Abnormalities in Children with Epilepsy
Source: PubMed Central journal article supplement (PMC4970731; doi:10.1371/journal.pone.0160508), 2016-08-02
Supplement: pone.0160508.s006.pdf [file pone.0160508.s006.pdf]

S3 Table. Means (SD) of peak velocity (Deg/Sec) at 8 degrees amplitude for patients and controls for PS, AS and PE.

|              | Chronic      | Controlled   | Healthy Controls |
|--------------|--------------|--------------|------------------|
| Saccade Type |              |              |                  |
| PS           | 369.5 (49.9) | 374.2 (51.8) | 360.5 (53.1)     |
| AS           | 354.1 (71.2) | 350.4 (65.9) | 358.1 (154.3)    |
| PE           | 376.6 (57.7) | 380.8 (44.8) | 352.4 (55.9)     |
